# Supplementary material
Source: publisher site journal article supplement (https://www.dovepress.com/article/126647)
Supplement: Supplementary file 1 [file get_supplementary_file.php]

# LMQ

Living with Medicines  
Questionnaire

## Medicines and Your Day-to-Day Life

This questionnaire seeks **your** views and opinions about the prescribed medicines **you** take and how they affect **your** life.

**Medicines include tablets, creams, inhalers, liquids and so on.**

This booklet contains statements which cover different aspects of using medicines.

Please read each statement carefully and tick the response box that is closest to your personal opinion. Please tick only one box for each statement.

# Medicines and Your Day-to-Day Life – Living with Medicines Questionnaire

Please tick the option that applies to each of the statements.

|    |                                                                    | Strongly agree           | Agree                    | Neutral opinion          | Disagree                 | Strongly disagree        |
|----|--------------------------------------------------------------------|--------------------------|--------------------------|--------------------------|--------------------------|--------------------------|
| 1. | The instructions on my medicines are <b>easy</b> to follow.        | <input type="checkbox"/> |
| 2. | I find getting my prescriptions from the doctor <b>difficult</b> . | <input type="checkbox"/> |
| 3. | I find getting my medicines from the pharmacist <b>difficult</b> . | <input type="checkbox"/> |
| 4. | My medicines are <b>important</b> to me.                           | <input type="checkbox"/> |

---

|    |                                                                 | Strongly agree           | Agree                    | Neutral opinion          | Disagree                 | Strongly disagree        |
|----|-----------------------------------------------------------------|--------------------------|--------------------------|--------------------------|--------------------------|--------------------------|
| 5. | I find opening the packaging of my medicines <b>difficult</b> . | <input type="checkbox"/> |
| 6. | I am <b>concerned</b> about running out of medicines.           | <input type="checkbox"/> |
| 7. | It is <b>difficult</b> to identify which medicine is which.     | <input type="checkbox"/> |
| 8. | It is <b>easy</b> to keep to my medicines routine.              | <input type="checkbox"/> |

---

|     |                                                                                      | Strongly agree           | Agree                    | Neutral opinion          | Disagree                 | Strongly disagree        |
|-----|--------------------------------------------------------------------------------------|--------------------------|--------------------------|--------------------------|--------------------------|--------------------------|
| 9.  | I would be <b>concerned</b> if I forgot to take my medicines.                        | <input type="checkbox"/> |
| 10. | I am <b>concerned</b> that I may forget to take my medicines                         | <input type="checkbox"/> |
| 11. | I am <b>concerned</b> about experiencing side effects.                               | <input type="checkbox"/> |
| 12. | I am <b>concerned</b> about possible damaging long term effects of taking medicines. | <input type="checkbox"/> |
| 13. | Taking medicines is <b>routine</b> for me.                                           | <input type="checkbox"/> |

# Medicines and Your Day-to-Day Life – Living with Medicines Questionnaire

Please tick the option that applies to each of the statements.

|     |                                                                       | Strongly agree           | Agree                    | Neutral opinion          | Disagree                 | Strongly disagree        |
|-----|-----------------------------------------------------------------------|--------------------------|--------------------------|--------------------------|--------------------------|--------------------------|
| 14. | I am <b>comfortable</b> taking the medicines I have been prescribed.  | <input type="checkbox"/> |
| 15. | I am <b>comfortable</b> with the times I should take my medicines.    | <input type="checkbox"/> |
| 16. | I find the patient leaflet in my medicines containers <b>useful</b> . | <input type="checkbox"/> |
| 17. | I find using my medicines <b>difficult</b> .                          | <input type="checkbox"/> |
| 18. | I am <b>satisfied</b> with the effectiveness of my medicines.         | <input type="checkbox"/> |
| 19. | I am <b>concerned</b> that I am too dependent on my medicines.        | <input type="checkbox"/> |

---

|     |                                                                             | Strongly agree           | Agree                    | Neutral opinion          | Disagree                 | Strongly disagree        |
|-----|-----------------------------------------------------------------------------|--------------------------|--------------------------|--------------------------|--------------------------|--------------------------|
| 20. | I am <b>confident</b> speaking to my doctor(s) about my medicines.          | <input type="checkbox"/> |
| 21. | I <b>understand</b> what my doctor(s) tell me about my medicines.           | <input type="checkbox"/> |
| 22. | The information my doctor(s) gives me about my medicines is <b>useful</b> . | <input type="checkbox"/> |

---

|     |                                                                              | Strongly agree           | Agree                    | Neutral opinion          | Disagree                 | Strongly disagree        |
|-----|------------------------------------------------------------------------------|--------------------------|--------------------------|--------------------------|--------------------------|--------------------------|
| 23. | I am <b>confident</b> speaking to my pharmacist about my medicines.          | <input type="checkbox"/> |
| 24. | I <b>understand</b> what my pharmacist tells me about my medicines.          | <input type="checkbox"/> |
| 25. | The information my pharmacist gives me about my medicines is <b>useful</b> . | <input type="checkbox"/> |

Please Turn Over

# Medicines and Your Day-to-Day Life – Living with Medicines Questionnaire

Please tick the option that applies to each of the statements.

|                                                         | Strongly agree           | Agree                    | Neutral opinion          | Disagree                 | Strongly disagree        |
|---------------------------------------------------------|--------------------------|--------------------------|--------------------------|--------------------------|--------------------------|
| 26. I sometimes run out of medicines.                   | <input type="checkbox"/> |
| 27. I accept that I have to take medicines long term.   | <input type="checkbox"/> |
| 28. My medicines allow me to live my life as I want to. | <input type="checkbox"/> |
| 29. My life revolves around using my medicines.         | <input type="checkbox"/> |
| 30. My medicines live up to my expectations.            | <input type="checkbox"/> |

---

|                                                                                              | Strongly agree           | Agree                    | Neutral opinion          | Disagree                 | Strongly disagree        |
|----------------------------------------------------------------------------------------------|--------------------------|--------------------------|--------------------------|--------------------------|--------------------------|
| 31. My medicines prevent my condition getting worse.                                         | <input type="checkbox"/> |
| 32. Taking medicines interferes with my social life.                                         | <input type="checkbox"/> |
| 33. I trust the judgement of my doctor(s) in choosing medicines for me.                      | <input type="checkbox"/> |
| 34. I have to put a lot of planning and thought into taking my medicines.                    | <input type="checkbox"/> |
| 35. Taking medicines causes me problems with daily tasks (such as work, housework, hobbies). | <input type="checkbox"/> |

---

|                                                                                   | Strongly agree           | Agree                    | Neutral opinion          | Disagree                 | Strongly disagree        |
|-----------------------------------------------------------------------------------|--------------------------|--------------------------|--------------------------|--------------------------|--------------------------|
| 36. I am unhappy with the extent to which my medicines interact with alcohol.     | <input type="checkbox"/> |
| 37. Taking medicines affects my driving ability.                                  | <input type="checkbox"/> |
| 38. I worry that I have to take several medicines at the same time.               | <input type="checkbox"/> |
| 39. The side effects I get are worse than the problem for which I take medicines. | <input type="checkbox"/> |
| 40. I worry that my medicines may interact with each other.                       | <input type="checkbox"/> |

# Medicines and Your Day-to-Day Life – Living with Medicines Questionnaire

Please tick the option that applies to each of the statements.

|                                                                                                                             | Strongly agree           | Agree                    | Neutral opinion          | Disagree                 | Strongly disagree        |
|-----------------------------------------------------------------------------------------------------------------------------|--------------------------|--------------------------|--------------------------|--------------------------|--------------------------|
| 41. I can choose whether or not to take my medicines.                                                                       | <input type="checkbox"/> |
| 42. My doctor(s) spend enough time discussing my medicines with me.                                                         | <input type="checkbox"/> |
| 43. I know enough about my medicines.                                                                                       | <input type="checkbox"/> |
| 44. I am able to balance my day to day life with taking medicines                                                           | <input type="checkbox"/> |
| 45. There is enough sharing of information about my medicines between the different health professionals providing my care. | <input type="checkbox"/> |

|                                                                                                      | Strongly agree           | Agree                    | Neutral opinion          | Disagree                 | Strongly disagree        |
|------------------------------------------------------------------------------------------------------|--------------------------|--------------------------|--------------------------|--------------------------|--------------------------|
| 46. I have a say in the brands of medicines I use.                                                   | <input type="checkbox"/> |
| 47. I always follow my doctor(s) advice about my medicines.                                          | <input type="checkbox"/> |
| 48. I sometime feel I need to get information from other sources (such as books, friends, internet). | <input type="checkbox"/> |
| 49. I can change the times I take my medicines if I want to.                                         | <input type="checkbox"/> |
| 50. The health professionals providing my care know enough about me and my medicines.                | <input type="checkbox"/> |

|                                                                         | Strongly agree           | Agree                    | Neutral opinion          | Disagree                 | Strongly disagree        |
|-------------------------------------------------------------------------|--------------------------|--------------------------|--------------------------|--------------------------|--------------------------|
| 51. My medicines are working.                                           | <input type="checkbox"/> |
| 52. I can adapt my medicine-taking to my lifestyle.                     | <input type="checkbox"/> |
| 53. My doctor(s) listen to my opinions and concerns about my medicines. | <input type="checkbox"/> |
| 54. I can vary the dose of the medicines I take.                        | <input type="checkbox"/> |
| 55. I get too much information about my medicines.                      | <input type="checkbox"/> |

Please Turn Over

# Medicines and Your Day-to-Day Life – Living with Medicines Questionnaire

Please tick the option that applies to each of the statements.

|                                                                             | Strongly agree           | Agree                    | Neutral opinion          | Disagree                 | Strongly disagree        |
|-----------------------------------------------------------------------------|--------------------------|--------------------------|--------------------------|--------------------------|--------------------------|
| 56. Changes in daily routine cause problems with my medicines.              | <input type="checkbox"/> |
| 57. My doctor(s) takes my concerns about side effects seriously.            | <input type="checkbox"/> |
| 58. My medicines have an adverse effect on my sexual life.                  | <input type="checkbox"/> |
| 59. The side effects are worth it for the benefits I get from my medicines. | <input type="checkbox"/> |
| 60. The medicines I use have an adverse effect on the holidays I can take.  | <input type="checkbox"/> |

If you have any other views about how your medicines affect your day-to-day life, please describe them here.

Finally, please answer a few questions about you and your medicines

Are you: Male  Female

What is your age? 18-29  30-49  50-64   
65-74  75-89  over 90

Which ethnic group best describe you? (Please tick **one** box only)

White  Mixed  Asian or Asian British   
Black or Black British  Chinese  Other  .....

What is the highest level of education you have completed?

None  Primary/ Few years secondary   
Secondary completed  College/Further education   
Bachelor degree  Higher degree   
Still studying  (Please tell us what level are you in)

How many medicines do you take regularly? less than 4  between 4 and 8  more than 8

**Medicines include tablets, creams, inhalers, liquids and so on.**  
**Count each different prescription as one medicine.**

What is your employment status? Employed  Unemployed  Retired

Do you pay for your prescriptions? Yes  No

Does someone help you with using your medicines? Yes  No

If you answered yes, who helps you? Spouse/Partner  Relative  Other

If you answered other, please write here who helps you. \_\_\_\_\_

Thank you for taking the time to complete this questionnaire.
